# Supplementary material
Source: PubMed Central journal article supplement (PMC8502432)
Supplement: eraa513_suppl_supplementary_file001.pdf [file eraa513_suppl_supplementary_file001.pdf]

## Supplemental information

### A guide to plant TPX2-like and WAVE-DAMPENED2-like proteins

Andrei Smertenko, Shaun J. Clare, Karl Effertz, Alyssa Parish, Austin Ross, Sharol Schmidt

**Table S1. Positions of conserved domains in *Arabidopsis* TPX2-family proteins.**

| Protein Name | SFG   | Aurora-binding | TPX2 Signature | TPX2-C  |
|--------------|-------|----------------|----------------|---------|
| WDL1         |       |                |                | 126-212 |
| WVD2         |       |                |                | 86-172  |
| WDL2         |       |                |                | 164-250 |
| WDL3         |       |                |                | 193-279 |
| WDL4         |       |                |                | 248-330 |
| WDL5         |       |                |                | 206-292 |
| WDL6         |       |                |                | 181-267 |
| WDL7         | 22-72 |                |                | 329-390 |
| WDL8         | 27-78 |                |                | 322-387 |
| WDL9         | 34-84 |                |                | 403-461 |
| TPX2         |       | 21-55          | 330-455        | 649-729 |
| TPXL1/MDP60  |       |                |                | 376-456 |
| TPXL2        |       | 31-65          | 259-376        |         |
| TPXL3        |       | 23-57          | 267-383        |         |
| TPXL4        |       | 30-75          | 221-321        |         |
| TPXL5        |       |                |                | 386-466 |
| TPXL6/MAP20  |       |                |                | 72-152  |
| TPXL7        |       |                |                | 210-290 |
| TPXL8        |       | 20-59          | 209-325        |         |
| MDP40        | 22-72 |                |                |         |

**Supplemental Table 2. Functions of TPX2-family proteins.**

| Protein name    | Functions                                                                                                                           | References                                                                             |
|-----------------|-------------------------------------------------------------------------------------------------------------------------------------|----------------------------------------------------------------------------------------|
| WDL1            | Anisotropic cell expansion, organ twisting                                                                                          | (Perrin <i>et al.</i> , 2007; Yuen <i>et al.</i> , 2003)                               |
| WVD2            | Anisotropic cell expansion, organ twisting                                                                                          | (Perrin <i>et al.</i> , 2007; Yuen <i>et al.</i> , 2003)                               |
| WDL2            | Unknown                                                                                                                             |                                                                                        |
| WDL3            | Anisotropic cell expansion in response to the light                                                                                 | (Lian <i>et al.</i> , 2017; Liu <i>et al.</i> , 2013)                                  |
| WDL4            | Unknown                                                                                                                             |                                                                                        |
| WDL5            | Anisotropic cell expansion in response to ethylene in the dark, salt stress tolerance                                               | (Dou <i>et al.</i> , 2018; Ma <i>et al.</i> , 2016)                                    |
| WDL6            | Unknown                                                                                                                             |                                                                                        |
| WDL7            | Unknown                                                                                                                             |                                                                                        |
| WDL8            | Unknown                                                                                                                             |                                                                                        |
| WDL9            | Unknown                                                                                                                             |                                                                                        |
| TPX2            | Activating Aurora kinase, nuclear envelope breakdown, mitotic spindle assembly                                                      | (Boruc <i>et al.</i> , 2019; Vos <i>et al.</i> , 2008)                                 |
| TPXL1/<br>MDP60 | Binds microtubules and contributes to anisotropic cell expansion in response to ethylene in the light, submergence stress tolerance | (Ma <i>et al.</i> , 2018; Tomastikova <i>et al.</i> , 2020; Wang <i>et al.</i> , 2020) |
| TPXL2           | Microtubule targeting and activating Aurora kinase; mitotic spindle assembly                                                        | (Boruc <i>et al.</i> , 2019; Tomastikova <i>et al.</i> , 2020)                         |
| TPXL3           | Microtubule targeting and activating Aurora kinase; mitotic spindle assembly                                                        | (Boruc <i>et al.</i> , 2019; Tomastikova <i>et al.</i> , 2020)                         |
| TPXL4           | Localizes on microtubules and inside nucleus in <i>N. benthamiana</i> leaf pavement cells, activates Aurora kinase                  | (Tomastikova <i>et al.</i> , 2020)                                                     |
| TPXL5           | Binds microtubules in <i>N. benthamiana</i> leaf pavement cells                                                                     | (Tomastikova <i>et al.</i> , 2020)                                                     |
| TPXL6/<br>MAP20 | Xylem size, vascular pits size and pit membrane thickness, drought tolerance                                                        | (Rajangam <i>et al.</i> , 2008a; Smertenko <i>et al.</i> , 2020)                       |
| TPXL7           | Localizes in the cytoplasm and nuclear envelope in <i>N. benthamiana</i> leaf pavement cells                                        | (Tomastikova <i>et al.</i> , 2020)                                                     |
| TPXL8           | Localizes on microtubules and inside nucleus in <i>N. benthamiana</i> leaf pavement cells, activates Aurora kinase                  | (Tomastikova <i>et al.</i> , 2020)                                                     |
| MDP40           | Anisotropic cell expansion in response to brassinosteroids in the dark                                                              | (Wang <i>et al.</i> , 2012)                                                            |
